# Supplementary material for: Radiomic model for differentiating parotid pleomorphic adenoma from parotid adenolymphoma based on MRI images
Source: PubMed Central journal article supplement (PMC7981906; doi:10.1186/s12880-021-00581-9), 2021-03-20
Supplement: 12880_2021_581_MOESM1_ESM.pdf [file 12880_2021_581_MOESM1_ESM.pdf]

## Additional file 1

### Category: Intensity Histogram

| Variable                  | Description                                                                                     | Parameters                                                                   |
|---------------------------|-------------------------------------------------------------------------------------------------|------------------------------------------------------------------------------|
| Inter Quartile Range      | The interquartile range of the occurrence probability values in the histogram.                  | N/A                                                                          |
| Kurtosis                  | Measure the peakedness of the occurrence probability values in the histogram.                   | N/A                                                                          |
| Mean Absolute Deviation   | The mean absolute deviation of the occurrence probability values in the histogram.              | N/A                                                                          |
| Median Absolute Deviation | The median absolute deviation of the occurrence probability values in the histogram.            | N/A                                                                          |
| Percentile                | Percentiles of the occurrence probability values in the histogram.                              | Percentile=5 10 15 20<br>25 30 35 40 45 50<br>55 60 65 70 75 80<br>85 90 95; |
| Percentile Area           | Percentiles of values in the accumulative histogram.                                            | Percentile=5 10 15 20<br>25 30 35 40 45 50<br>55 60 65 70 75 80<br>85 90 95; |
| Quantile                  | Quantiles of the occurrence probability values in the histogram.                                | Quantile=0.025 0.25 0.5<br>0.75 0.975;                                       |
| Range                     | Measure the range (Max Value -Min Value) of the occurrence probability values in the histogram. | N/A                                                                          |
| Skewness                  | Measure the asymmetry of the occurrence probability values in the histogram.                    | N/A                                                                          |

**Category: shape**

| Variable             | Description                                                                                                                                                           | Formula                                                                                                                                                          | Parameters |
|----------------------|-----------------------------------------------------------------------------------------------------------------------------------------------------------------------|------------------------------------------------------------------------------------------------------------------------------------------------------------------|------------|
| Compactness 1        | N/A                                                                                                                                                                   | $(\text{Volume})/(\text{sqrt}(\pi)*(\text{Surface Area})^{(2/3)})$                                                                                               | N/A        |
| Compactness 2        | N/A                                                                                                                                                                   | $36*\pi*(\text{Volume}^2)/((\text{Surface Area})^3)$                                                                                                             | N/A        |
| Convex               | <p>1. Measure the proportion of the pixels in the convex hull that are also in the region.</p> <p>2. Refer to MATLAB "regionprops (Mask, 'Solidity')" for details</p> | <p>1. Compute convex value in 2D slice-by-slice.</p> <p>Convex=regionprops (2DMask, 'Solidity')</p> <p>2. Compute the mean of convex value among the slices.</p> | N/A        |
| Convex Hull Volume   | The mean volume of the 2D convex hulls that are the convex envelopes of each slice's binary mask.                                                                     | N/A                                                                                                                                                              | N/A        |
| Convex Hull Volume3D | 3D volume of the convex hull that is the convex envelope of binary mask.                                                                                              | N/A                                                                                                                                                              | N/A        |
| Mass                 | Mass calculation is only meaningful to CT images.                                                                                                                     | N/A                                                                                                                                                              | N/A        |
| Max3D Diameter       | Max3DDiameter= largest pairwise Euclidean                                                                                                                             | N/A                                                                                                                                                              | N/A        |

|                         |                                                                                                                                                        |                                                                                                                                                                                  |                          |
|-------------------------|--------------------------------------------------------------------------------------------------------------------------------------------------------|----------------------------------------------------------------------------------------------------------------------------------------------------------------------------------|--------------------------|
|                         | distance between voxels on the surface of the tumor volume.                                                                                            |                                                                                                                                                                                  |                          |
| Mean Breadth            | MeanBreath=Integral of mean curvature                                                                                                                  | N/A                                                                                                                                                                              | N/A                      |
| Number of Objects       | N/A                                                                                                                                                    | N/A                                                                                                                                                                              | N/A                      |
| Number of Voxel         | The number of voxels treating the edge voxels differently.                                                                                             | N/A                                                                                                                                                                              | Edge Voxel Fraction=0.5; |
| Orientation             | 1. Measure the angle between the x-axis and the major axis of the ellipse in 2D.<br>2. Refer to MATLAB "regionprops (Mask, 'Orientation')" for details | 1. First, compute orientation value in 2D slice-by-slice.<br>Orientation=regionprops(2D Mask, 'Orientation')<br>2. Then, compute the mean of orientation value among the slices. | N/A                      |
| Roundness               | 1. Measure how much the binary mask is close to circle in 2D.<br>2. Refer to MATLAB "regionprops(Mask, 'Eccentricity')" for details                    | 1. First, compute roundness value in 2D slice-by-slice.<br>Roundness=1-regionprops(2D Mask, 'Eccentricity')<br>2. Then, compute the mean of roundness value among the slices.    | N/A                      |
| Spherical Disproportion | N/A                                                                                                                                                    | N/A                                                                                                                                                                              | N/A                      |

|                      |                                                                      |                                                                |                           |
|----------------------|----------------------------------------------------------------------|----------------------------------------------------------------|---------------------------|
| Sphericity           | N/A                                                                  | N/A                                                            | N/A                       |
| Surface Area         | The surface area of the binary mask.                                 | N/A                                                            | N/A                       |
| Surface Area Density | Surface Area Density == Surface Volume Ration in Hugo's paper below. | (surface area of the binary mask)/(volume of the binary mask). | N/A                       |
| Volume               | The physical volume treating the edge voxels differently.            | N/A                                                            | Edge Voxel Fraction =0.5; |
| Voxel Size           | The physical voxel size.                                             | N/A                                                            | N/A                       |

**Category: Gray Level Cooccurrence Matrix 25**

| Variable           | Description                                                                                               |
|--------------------|-----------------------------------------------------------------------------------------------------------|
| Auto Correlation   | Auto Correlation =-333-1, -333-4, -333-7, 0-1, 0-4, 0-7, 45-1,45-4,45-7,90-1,90-4,90-7,135-1,135-4,135-7, |
| Cluster Prominen   | Cluster Prominen= -333-1, -333-4, -333-7, 0-1, 0-4, 0-7, 45-1,45-4,45-7,90-1,90-4,90-7,135-1,135-4,135-7, |
| Cluster Shade      | Cluster Shade= -333-1,-333-4,-333-7,0-1,0-4,0-7,45-1, 45-4, 45-7,90-1,90-4,90-7,135-1,135-4,135-7,        |
| Cluster Tendendcy  | Cluster Tendendcy=-333-1,-333-4,-333-7,0-1,0-4,0-7, 45-1, 45-4,45-7,90-1,90-4,90-7,135-1,135-4,135-7,     |
| Contrast           | Contrast=-333-1,-333-4,-333-7, 0-1, 0-4, 0-7, 45-1, 45-4, 45-7, 90-1,90-4,90-7,135-1,135-4,135-7,         |
| Correlation        | Correlation=-333-1,-333-4,-333-7, 0-1, 0-4, 0-7, 45-1, 45-4, 45-7, 90-1,90-4,90-7,135-1,135-4,135-7,      |
| Difference Entropy | Difference Entropy=-333-1,-333-4,-333-7, 0-1, 0-4, 0-7, 45-1,                                             |

|                          |                                                                                                                 |
|--------------------------|-----------------------------------------------------------------------------------------------------------------|
|                          | 45-4,45-7,90-1,90-4,90-7,135-1,135-4,135-7,                                                                     |
| Dissimilarity            | Dissimilarity=-333-1,-333-4,-333-7, 0-1, 0-4, 0-7, 45-1, 45-4,<br>45-7,90-1,90-4,90-7,135-1,135-4,135-7,        |
| Energy                   | Energy=-333-1,-333-4,-333-7, 0-1, 0-4, 0-7, 45-1, 45-4, 45-7,<br>90-1,90-4,90-7,135-1,135-4,135-7,              |
| Entropy                  | Entropy=-333-1,-333-4,-333-7, 0-1, 0-4, 0-7, 45-1, 45-4,<br>45-7,90-1,90-4,90-7,135-1,135-4,135-7,              |
| Homogeneity              | Homogeneity=-333-1,-333-4,-333-7, 0-1, 0-4, 0-7, 45-1, 45-4,<br>45-7,90-1,90-4,90-7,135-1,135-4,135-7,          |
| Homogeneity2             | Homogeneity2=-333-1,-333-4,-333-7,0-1, 0-4, 0-7, 45-1,<br>45-4,45-7,90-1,90-4,90-7,135-1,135-4,135-7,           |
| InformationMeasureCorr1  | InformationMeasureCorr1=-333-1,-333-4,-333-7,0-1, 0-4,<br>0-7,45-1,45-4,45-7,90-1,90-4,90-7,135-1,135-4,135-7,  |
| InformationMeasureCorr2  | InformationMeasureCorr2=-333-1,-333-4,-333-7,0-1,<br>0-4,0-7,45-1,45-4,45-7,90-1,90-4,90-7,135-1,135-4,135-7,   |
| Inverse Diff Moment Norm | Inverse Diff Moment Norm=-333-1,-333-4,-333-7,0-1, 0-4,<br>0-7,45-1,45-4,45-7,90-1,90-4,90-7,135-1,135-4,135-7, |
| Inverse Diff Norm        | Inverse Diff Norm=-333-1,-333-4,-333-7,0-1,0-4,0-7,<br>45-1,45-4,45-7,90-1,90-4,90-7,135-1,135-4,135-7,         |
| Inverse Variance         | Inverse Variance=-333-1,-333-4,-333-7,0-1,0-4,0-7,45-1,<br>45-4,45-7,90-1,90-4,90-7,135-1,135-4,135-7,          |
| Max Probability          | Max Probability=-333-1,-333-4,-333-7, 0-1, 0-4, 0-7, 45-1,<br>45-4, 45-7,90-1,90-4,90-7,135-1,135-4,135-7,      |
| Sum Average              | Sum Average=-333-1,-333-4,-333-7, 0-1, 0-4, 0-7, 45-1, 45-4,<br>45-7,90-1,90-4,90-7,135-1,135-4,135-7,          |
| Sum Entropy              | Sum Entropy=-333-1,-333-4,-333-7, 0-1, 0-4, 0-7, 45-1, 45-4,                                                    |

|              |                                                                                                         |
|--------------|---------------------------------------------------------------------------------------------------------|
|              | 45-7,90-1,90-4,90-7,135-1,135-4,135-7,                                                                  |
| Sum Variance | Sum Variance=-333-1,-333-4,-333-7, 0-1, 0-4, 0-7, 45-1, 45-4,<br>45-7,90-1,90-4,90-7,135-1,135-4,135-7, |
| Variance     | Variance=-333-1,-333-4,-333-7, 0-1, 0-4, 0-7, 45-1, 45-4,<br>45-7,90-1,90-4,90-7,135-1,135-4,135-7,     |

**Category: Gray Level Run Length Matrix 25**

|                                 |                                          |
|---------------------------------|------------------------------------------|
| Variable                        |                                          |
| Gray Level Non uniformity       | Gray Level Non uniformity=-33,0,90       |
| High Gray Level Run Empha       | High Gray Level Run Empha=-33,0,90       |
| Long Run Emphasis               | Long Run Emphasis=-33,0,90               |
| Long Run High Gray Level Empha  | Long Run High Gray Level Empha=-33,0,90  |
| Long Run Low Gray Level Empha   | Long Run Low Gray Level Empha=-33,0,90   |
| Low Gray Level Run Empha        | Low Gray Level Run Empha=-33,0,90        |
| Run Length Non uniformity       | Run Length Non uniformity=-33,0,90       |
| Run Percentage                  | Run Percentage=-33,0,90                  |
| Short Run Emphasis              | Short Run Emphasis=-33,0,90              |
| Short Run High Gray Level Empha | Short Run High Gray Level Empha=-33,0,90 |
| Short Run Low Gray Level Empha  | Short Run Low Gray Level Empha=-33,0,90  |
